# Supplementary material for: The self-assembly and photophysical characterization of tri(cyclopenta[def]phenanthrene)-derived nanoparticles: a template free synthesis of hollow colloidosomes.
Source: Royal Society of Chemistry journal article supplement (doi:10.1039/c0jm00863j), 2010-01-01
Supplement: c0jm00863j.pdf [file c0jm00863j.pdf]

**Supporting Information For:**

**The Self-assembly and Photophysical Characterization of  
Tri(cyclopenta[def]phenanthrene)-derived Nanoparticles: A  
Template Free Synthesis of Hollow Colloidosomes.**

**Shanmugam Easwaramoorthi,<sup>†</sup> Pyosang Kim,<sup>†</sup> Jong Min Lim,<sup>†</sup> Suhee Song,<sup>‡</sup> Honsuk**

**Suh<sup>\*,‡</sup>, Jonathan L. Sessler,<sup>\*,¶</sup> Dongho Kim<sup>\*,‡</sup>**

<sup>†</sup>Spectroscopy Laboratory for Functional  $\pi$ -electronic Systems and Department of Chemistry, Yonsei  
University, Seoul 120-749, Korea.

<sup>‡</sup>Department of Chemistry and Chemistry Institute of Functional Materials, Pusan National University,  
Busan 609-030, Korea.

<sup>¶</sup>Department of Chemistry & Biochemistry, 1 University Station-A5300, The University of Texas at Austin,  
Austin, Texas 78712-0165, USA.

**Table S1.** Electronic absorption properties of oligo-MCPPs calculated using Gaussian 03 at the B3LYP/6-31G\* level.

| Molecule | Major Transitions                                                                    |             |                        |
|----------|--------------------------------------------------------------------------------------|-------------|------------------------|
|          | Transition                                                                           | Energy (eV) | Oscillator strength(f) |
| MCPP     | HOMO-0→LUMO+0(+70%), HOMO-1→LUMO+1(20%)                                              | 4.24        | 0.0734                 |
|          | HOMO-0→LUMO+1 (51%), HOMO-1→LUMO+0 (26%)                                             | 4.94        | 0.3083                 |
|          | HOMO-2→LUMO+1(45%), HOMO-0→LUMO+3(30%)                                               | 6.05        | 0.3068                 |
|          | HOMO-4→LUMO+0(+43%), HOMO-2→LUMO+2(27%)                                              | 6.61        | 0.2324                 |
| di-MCPP  | HOMO-0→LUMO+0(+51%), HOMO-0→LUMO+2(+18%),<br>HOMO-2→LUMO+0(+13%), HOMO-2→LUMO+2(12%) | 3.74        | 0.0676                 |
|          | HOMO-0→LUMO+2(+45%), HOMO-0→LUMO+0(28%),<br>HOMO-2→LUMO+0(+13%), HOMO-1→LUMO+1(5%)   | 3.93        | 0.3427                 |
|          | HOMO-1→LUMO+1(+66%), HOMO-0→LUMO+2(+9%),<br>HOMO-2→LUMO+0(6%)                        | 4.34        | 1.1705                 |
|          | HOMO-0→LUMO+0(+80%)                                                                  | 3.63        | 1.1425                 |
| tri-MCPP | HOMO-3→LUMO+1(+22%), HOMO-1→LUMO+2(+13%),<br>HOMO-4→LUMO+1(+12%), HOMO-3→LUMO+2(+9%) | 4.25        | 0.4711                 |
|          | HOMO-2→LUMO+3(+9%), HOMO-3→LUMO+4(+6%)<br>HOMO-1→LUMO+3(6%), HOMO-2→LUMO+2(+6%)      |             |                        |
|          | HOMO-3→LUMO+1(+42%), HOMO-4→LUMO+1(26%)                                              | 4.26        | 1.21                   |
|          | HOMO-3→LUMO+4(+31%), HOMO-4→LUMO+4(+23%)                                             | 4.78        | 0.5087                 |

|                   |                                          |      |        |
|-------------------|------------------------------------------|------|--------|
|                   | HOMO-0→LUMO+6(20%),HOMO-0→LUMO+5(6%)     |      |        |
| <b>tetra-MCPP</b> | HOMO-0→LUMO+0(+89%),                     | 3.5  | 2.13   |
|                   | HOMO-5→LUMO+1(+32%), HOMO-4→LUMO+2(+27%) | 4.22 | 1.5455 |
| <b>penta-MCPP</b> | HOMO-0→LUMO+0(+87%)                      | 3.94 | 2.9182 |
|                   | HOMO-1→LUMO+4(+10%), HOMO-4→LUMO+0(+10%) | 4.21 | 1.7773 |
|                   | HOMO-7→LUMO+3(9%), HOMO-2→LUMO+0(+7%)    |      |        |
|                   | HOMO-5→LUMO+1(+7%), HOMO-5→LUMO+2(+6%)   |      |        |
|                   | HOMO-7→LUMO+1(+6%)                       |      |        |
|                   | HOMO-1→LUMO+6(+33%), HOMO-0→LUMO+7(16%)  | 4.22 | 0.93   |
|                   | HOMO-4→LUMO+0(+14%)                      |      |        |

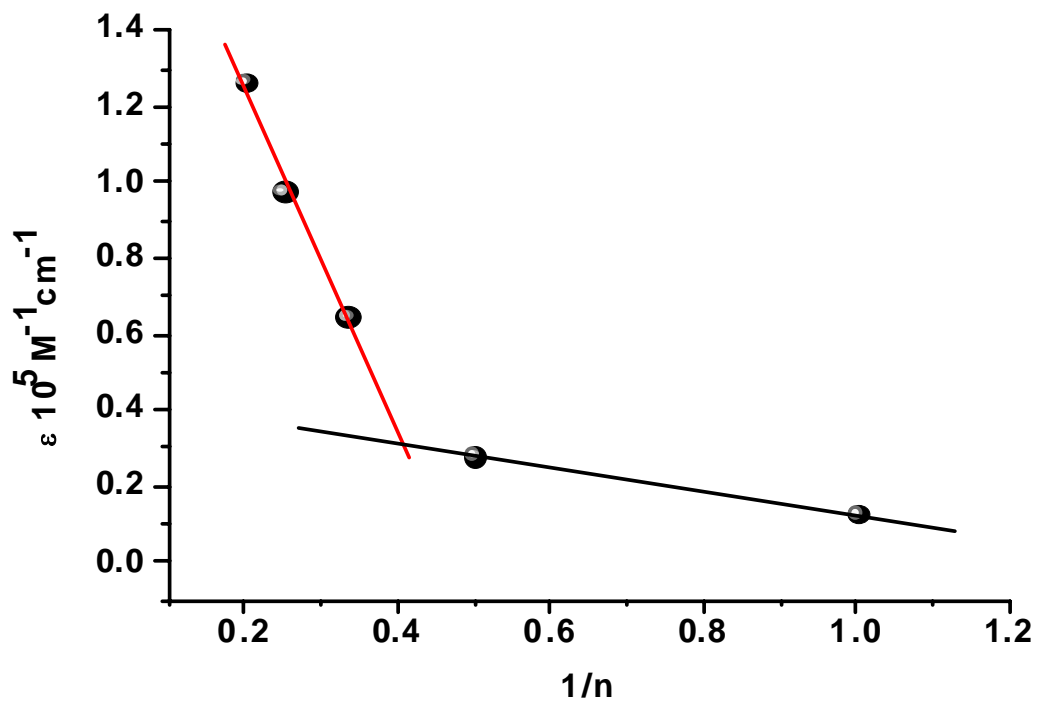

**Figure S1.** Plot of molar absorptivity at the low-energy absorption maximum vs. the inverse of the number of monomeric subunits.

## Optimized Geometries

### MCPP

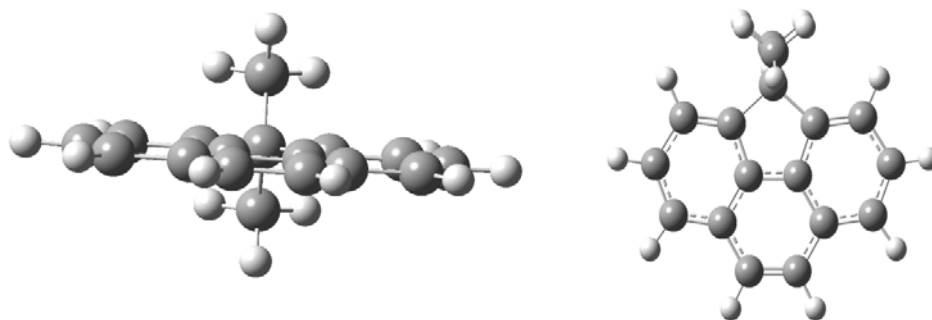

### di-MCPP

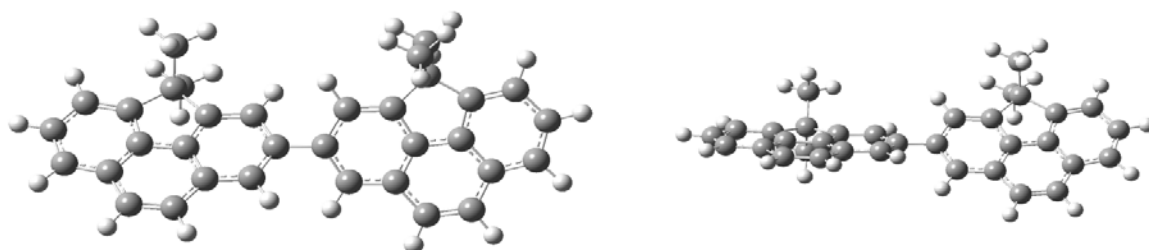

### tri-MCPP

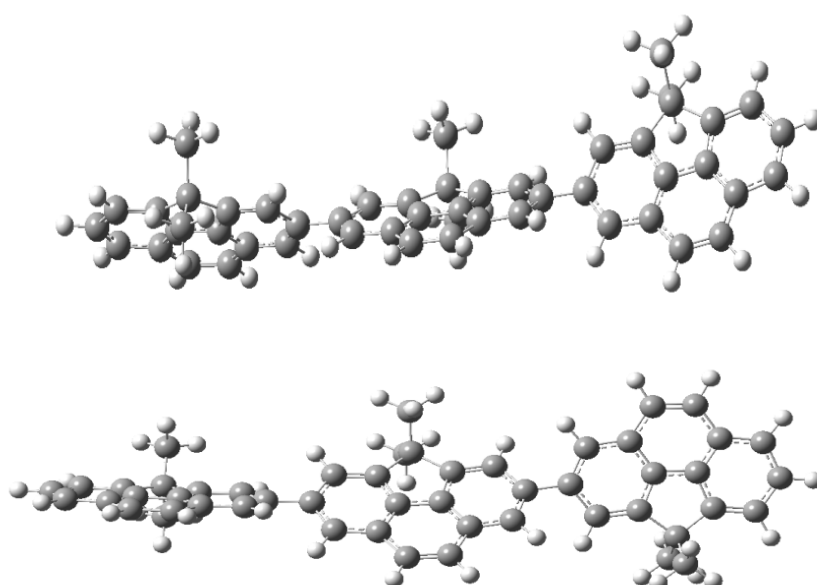

**tetra-MCPP**

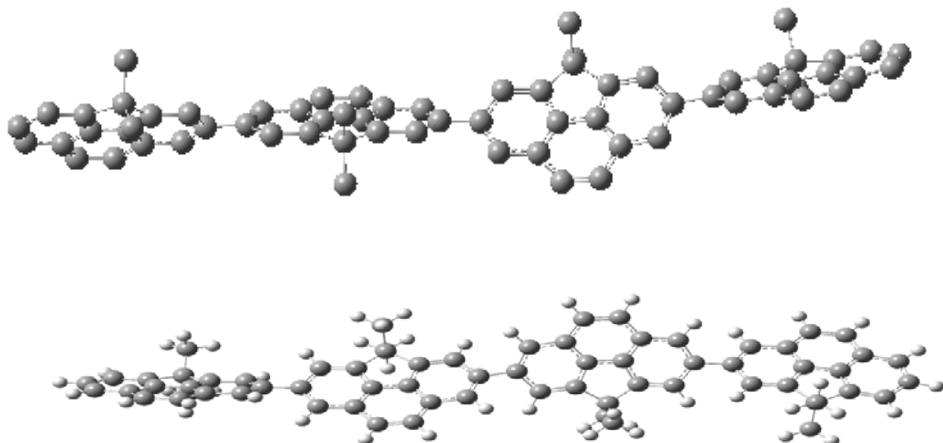

**penta-MCPP**

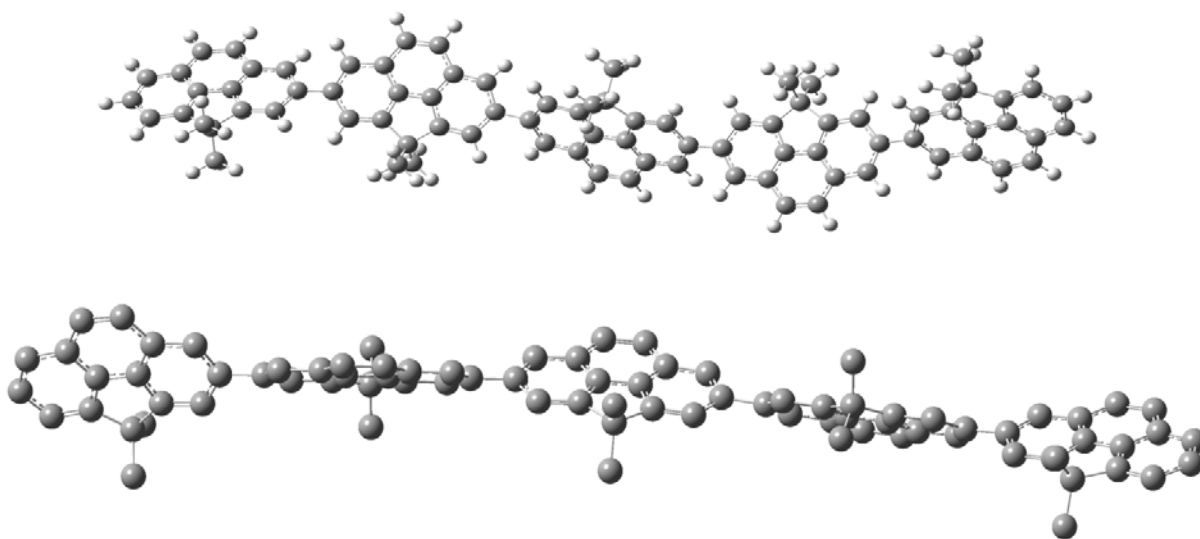

**Figure S2.** Optimized geometries (calculated at the B3LYP/6-31G\* level) of the MCPP oligomers considered in this study.

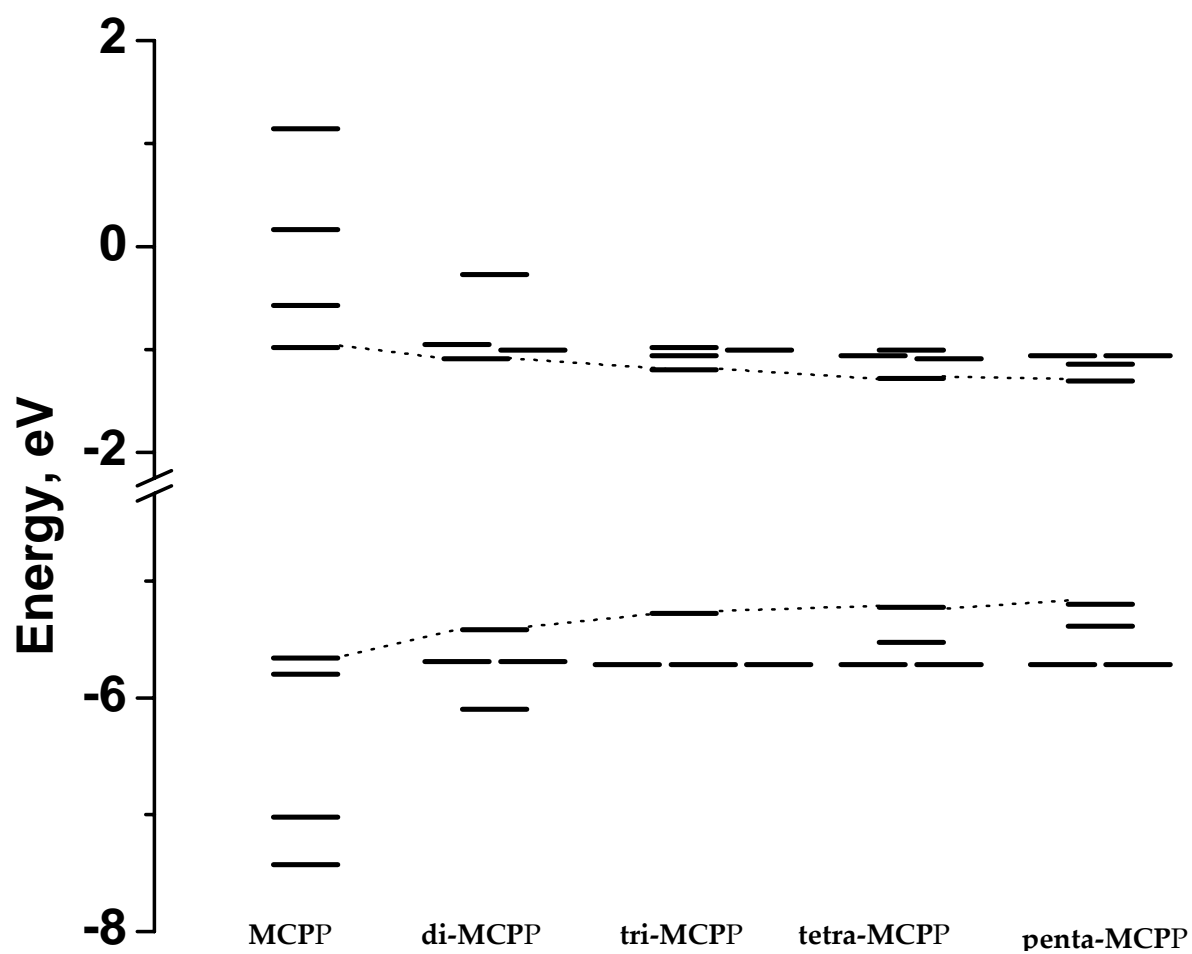

**Figure S3.** MO energy levels of the oligomers of this study calculated using Gaussian 03 at the B3LYP/6-31G\* level

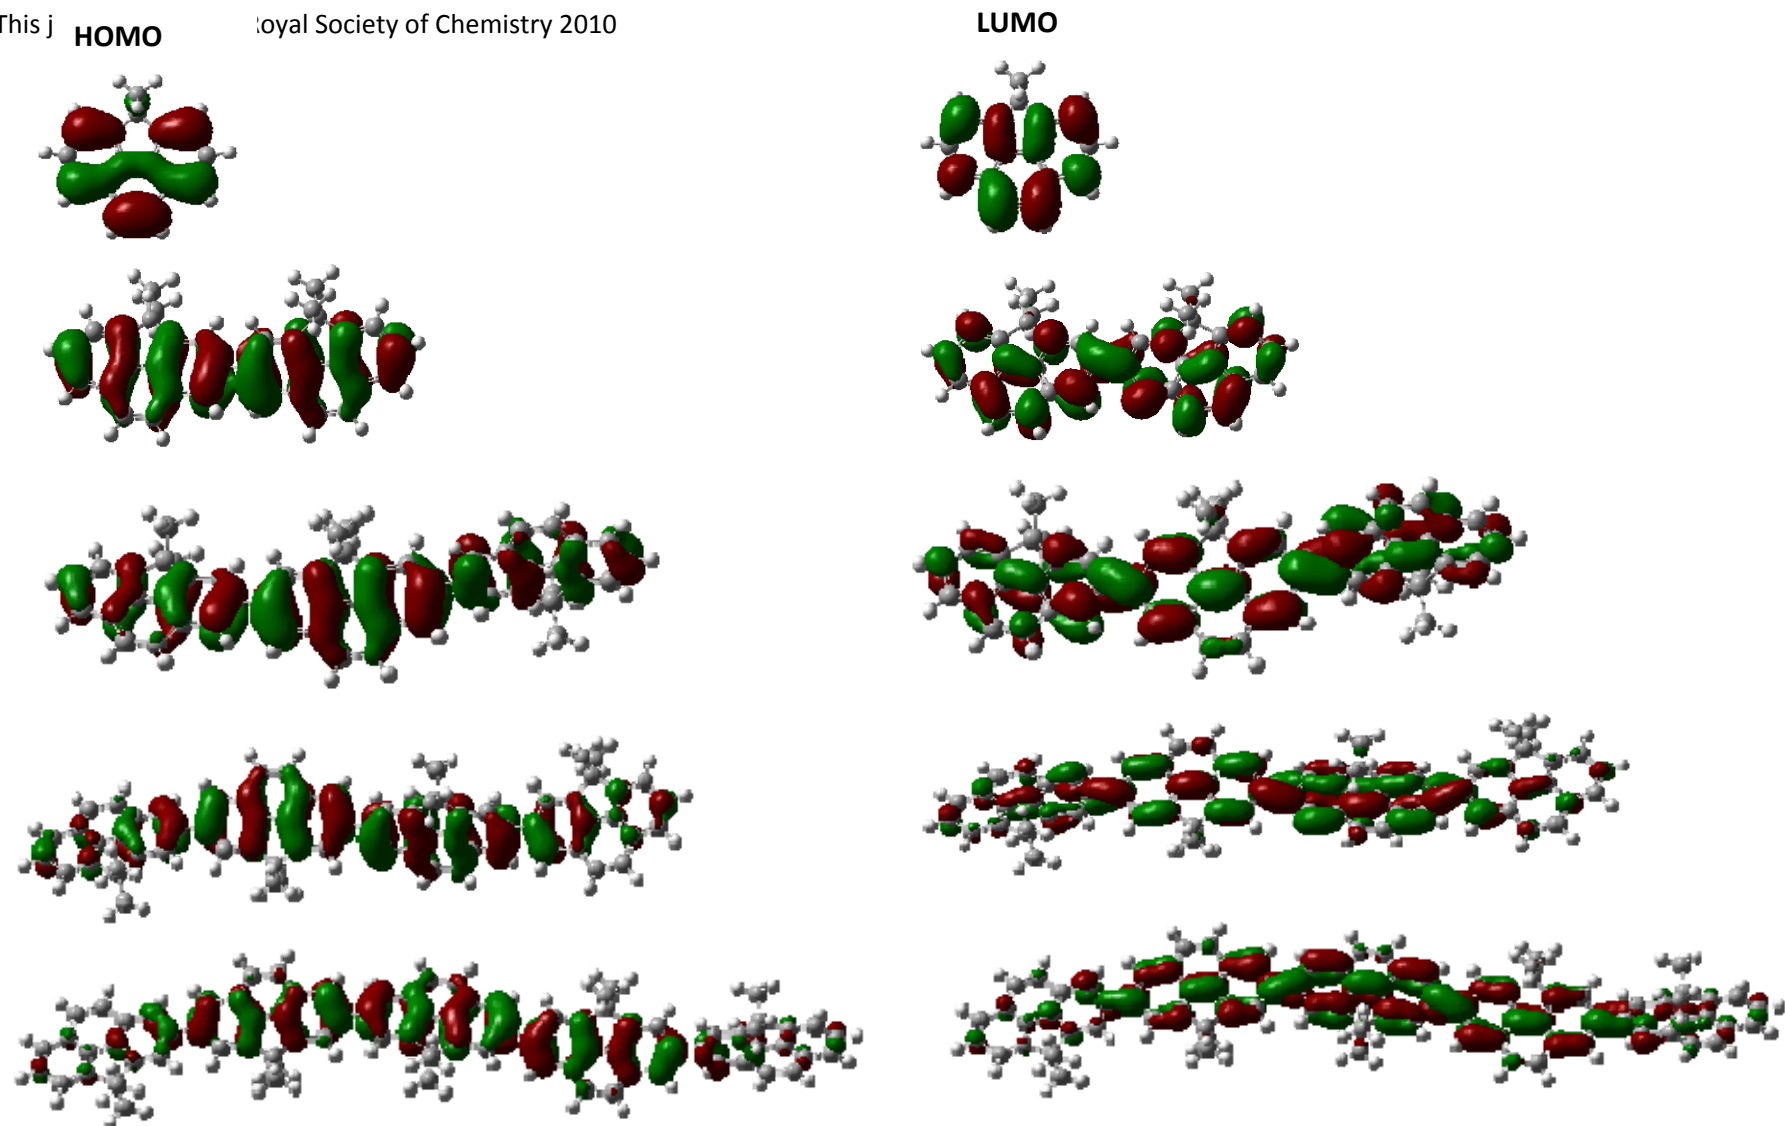

**Figure S4.** MO diagrams of the oligomers of this study calculated using Gaussian 03 at the B3LYP/6-31G\* level.



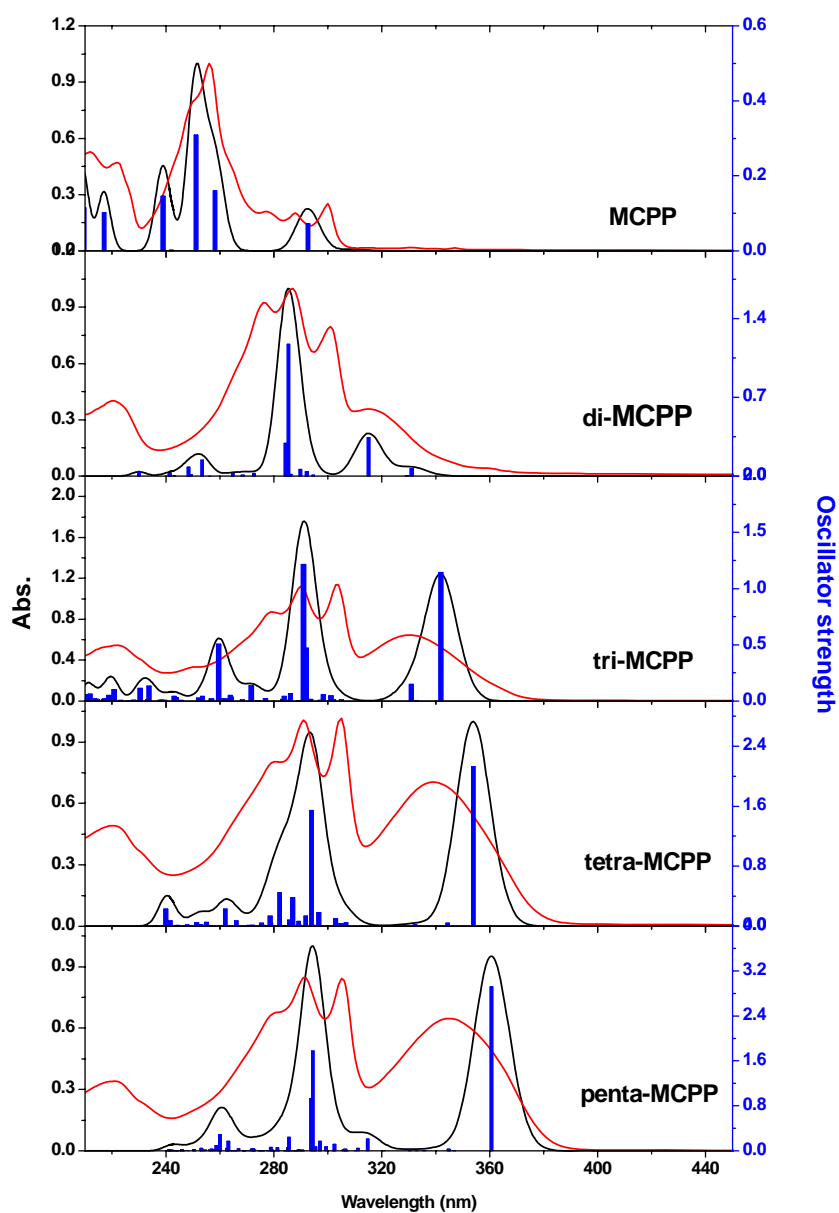

**Figure S5.** Simulated absorption (black) and the electronic transitions (blue) of various oligo-MCPPs obtained using Gaussian 03 at the B3LYP/6-31G\* level. Absorption spectra of the oligo-MCPPs (black) are given for comparison.

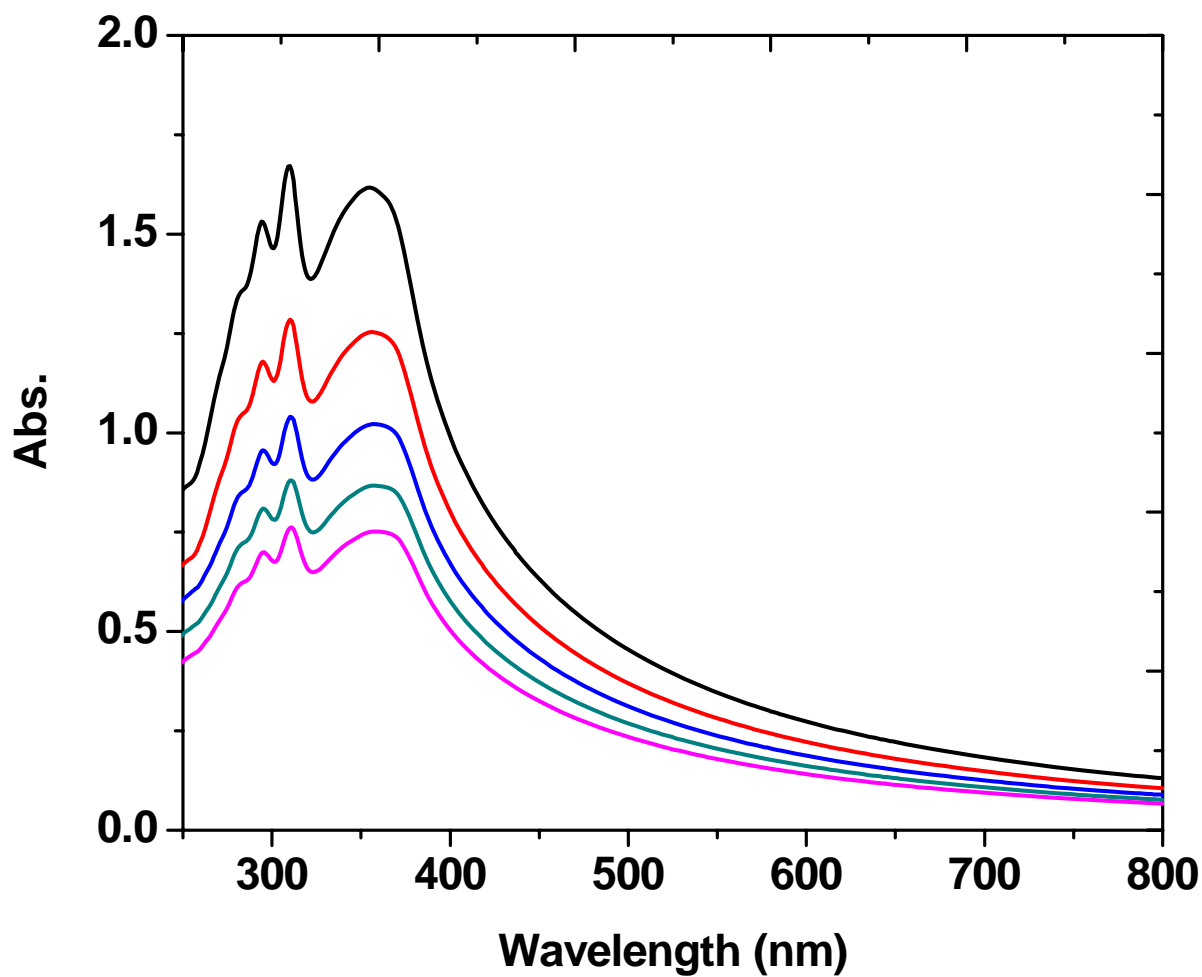

**Figure S6.** Change in the absorption spectra of **tri-MCPP-N2** observed upon dilution with water

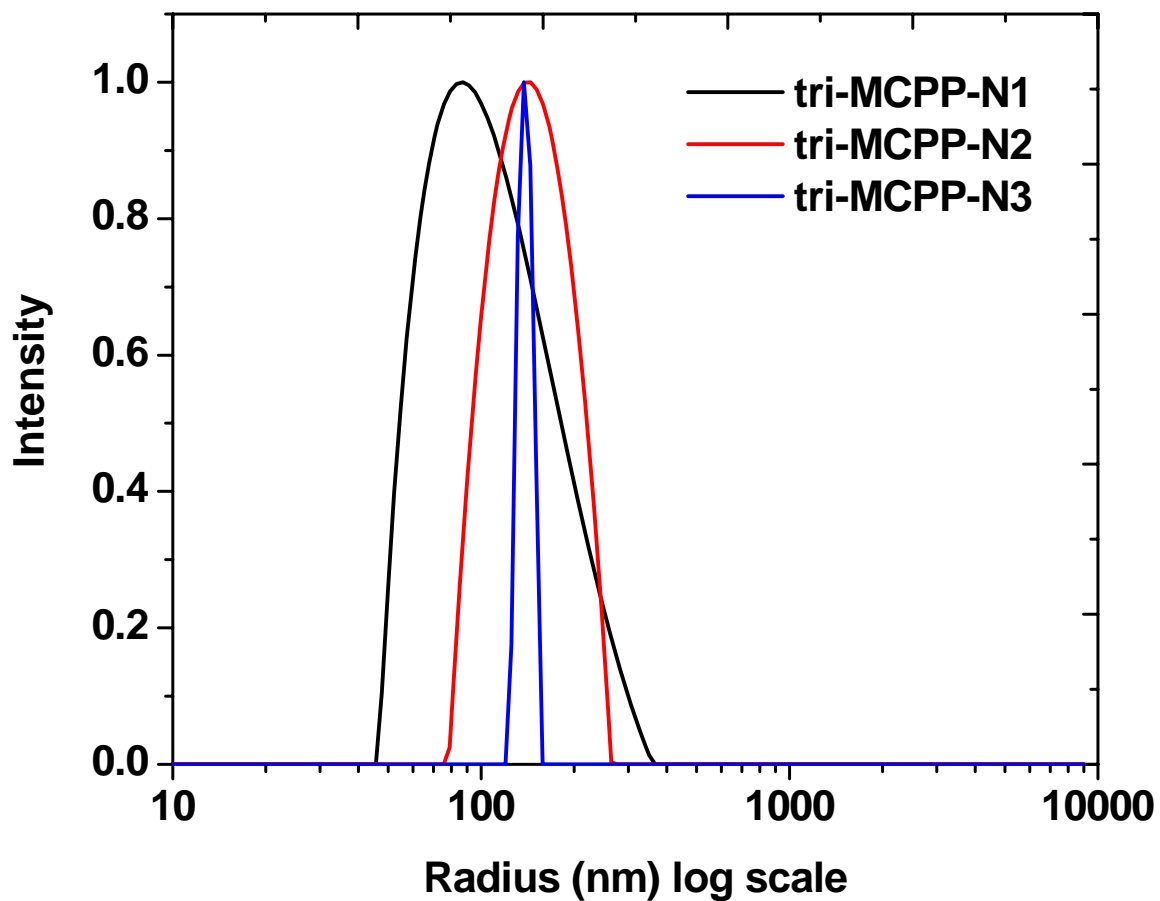

**Figure S7.** Dynamic light scattering spectra of nanostructures generated from **tri-MCPP** by using different water/THF ratios by volume

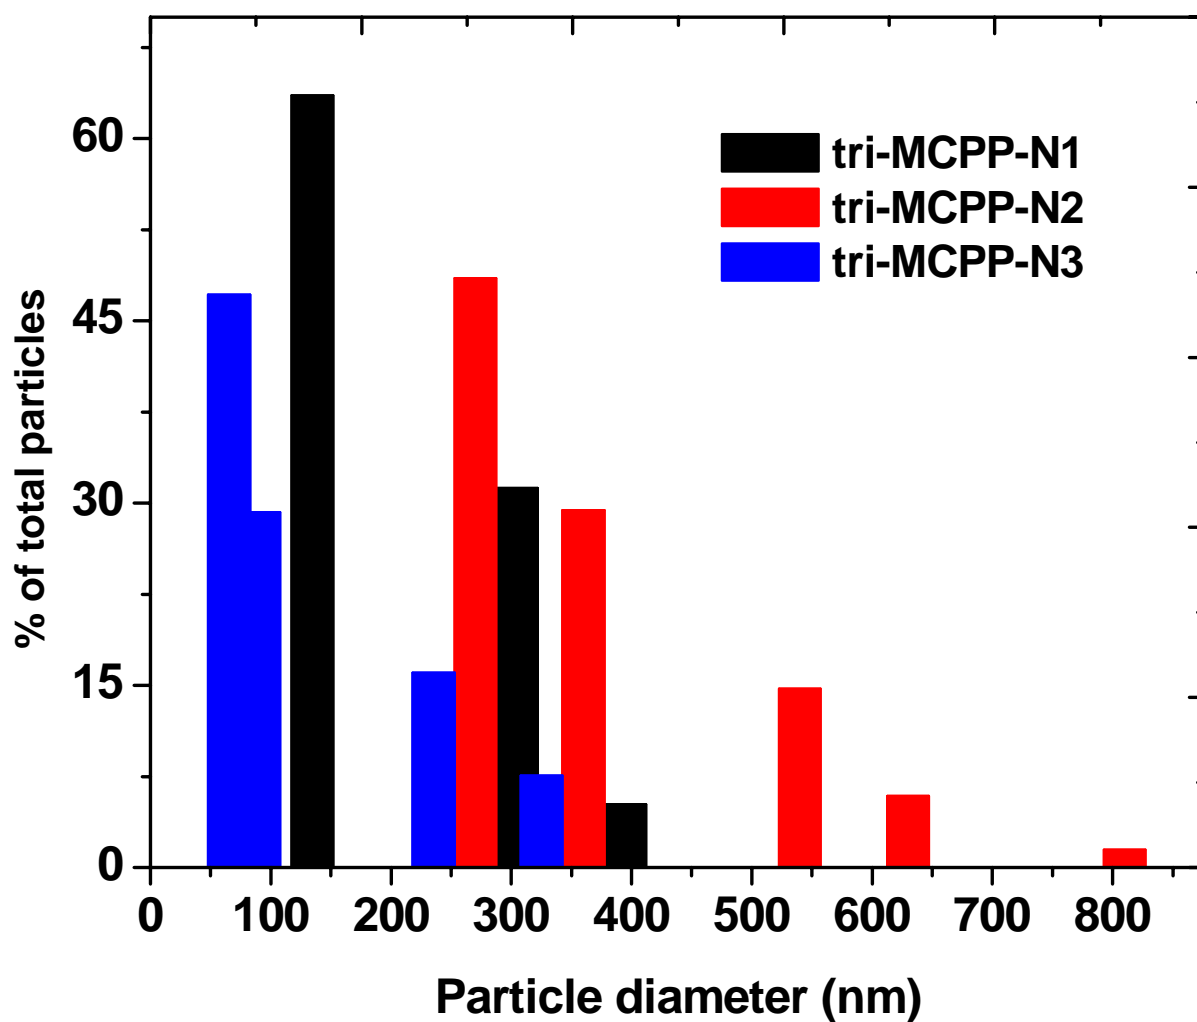

**Figure S8.** Particle size distribution determined from SEM images recorded using drop casted films of nanostructures formed from **tri-MCPP** by using different water/THF ratios by volume

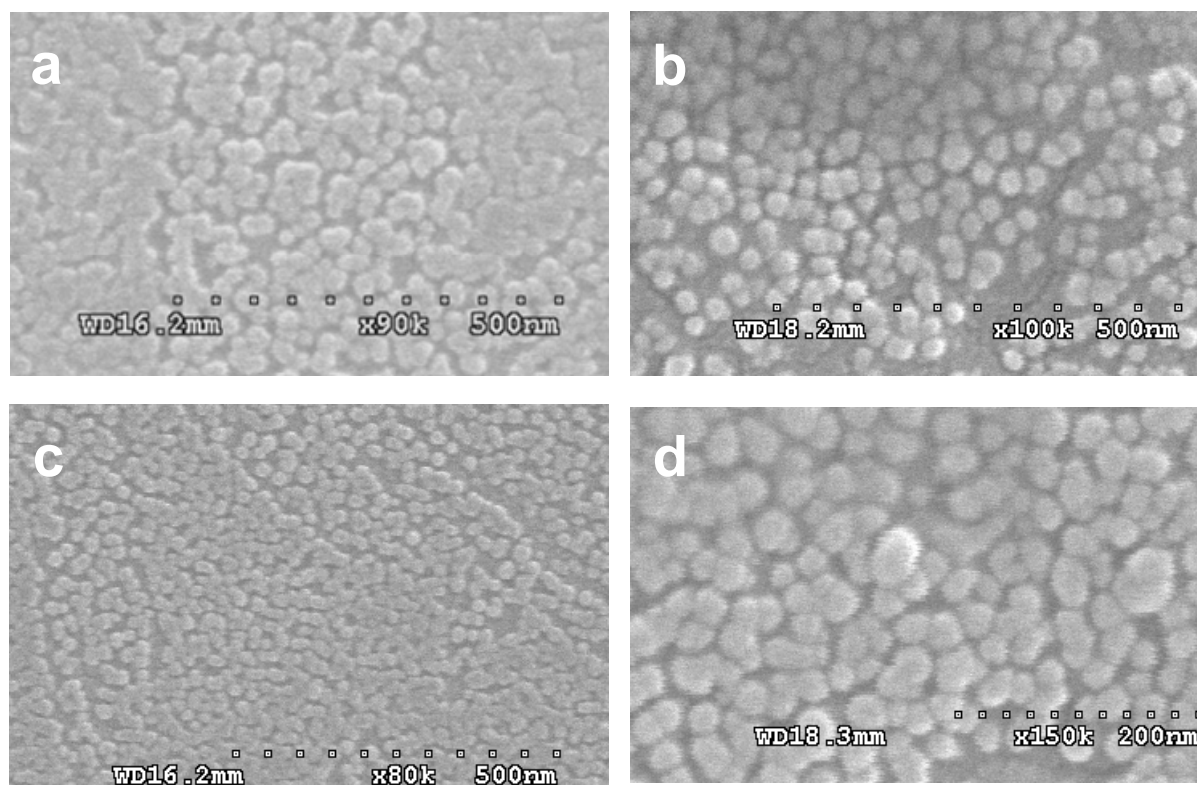

**Figure S9.** Representative SEM images of the aggregates formed from phenanthrene oligomers a) **MCPP**, b) **di-MCPP**, c) **tetra-MCPP** and d) **penta-MCPP** when subject to reprecipitation at 90%-10% water/THF ratios by volume

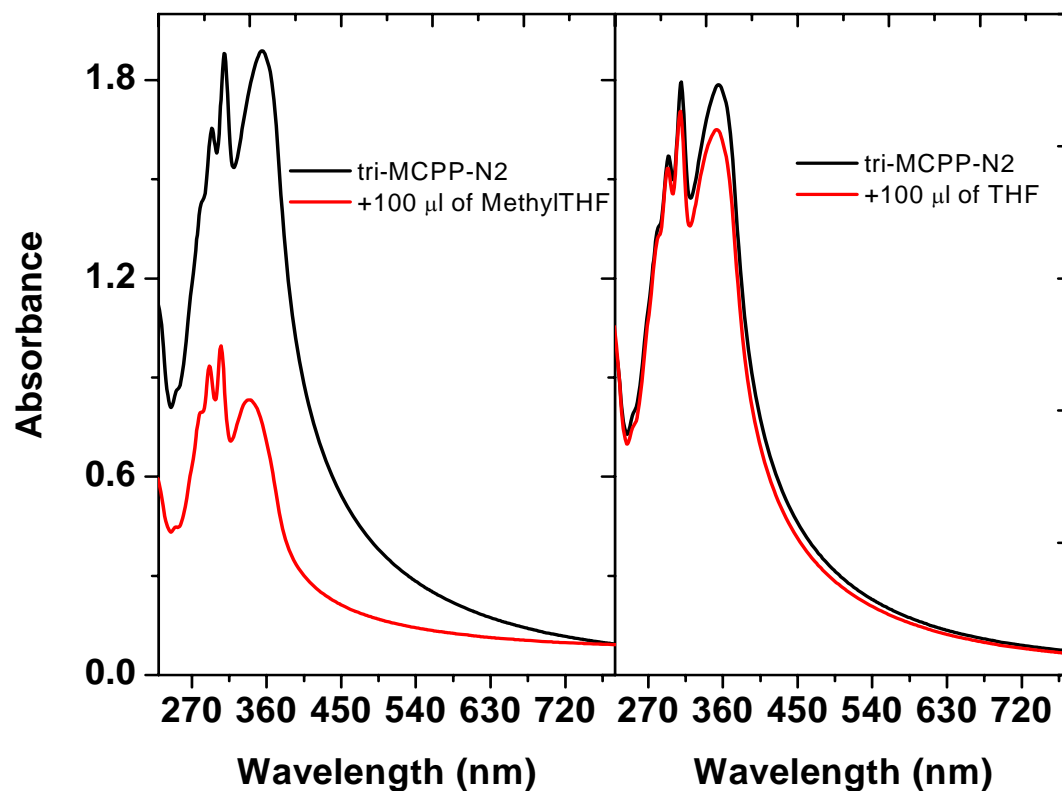

**Figure S10.** UV-visible absorption spectrum of **tri-MCPP-N2** recorded at a concentration of  $\sim 5 \times 10^{-5} \text{ M}^{-1}$  in a water/THF solvent mixture, 80:20 by volume
